# Supplementary material
Source: publisher site journal article supplement (https://thieme-connect.com/media/10.1055-s-00035024/201602/supmat/10-1160-th15-12-0982-supp.pdf)
Supplement: Supplementary file 1 [file 10-1160-th15-12-0982-supp.pdf]

**Supplementary Material to Wihadmadyatami et al. “Immunisation against  $\alpha\text{IIb}\beta_3$  and  $\alpha\text{v}\beta_3$  in a type 1 variant of Glanzmann’s thrombasthenia caused by a missense mutation Gly<sub>540</sub>Asp on  $\beta_3$ ” (Thromb Haemost 2016; 116.2)**

**Supplemental figure 1**

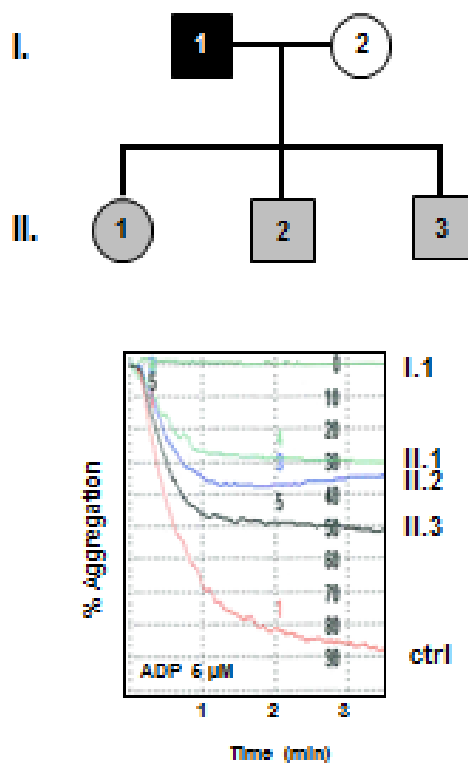

**Suppl. Figure 1: Pedigree and platelet aggregation study.** *Top panel.* Pedigree of the family; I.1 is the index patient. All three children (II.1 to II.3) are heterozygous carriers of the Gly<sub>540</sub>Asp mutation. *Bottom panel.* An example from a platelet aggregation study in the presence of 5  $\mu\text{M}$  ADP is shown. Platelets from a healthy individual were run as control.
